# Supplementary material
Source: ML conference proceedings conference paper supplement (https://proceedings.neurips.cc/paper_files/paper/2011/hash/eefc9e10ebdc4a2333b42b2dbb8f27b6-Abstract.html)
Supplement: Supplementary file [file eefc9e10ebdc4a2333b42b2dbb8f27b6-Supplemental.zip]

## Supplementary Material for Monte Carlo Value Iteration with Macro-Actions

**Lemma 1** Given value functions  $U$  and  $V$ ,  $\|HU - HV\|_\infty \leq \gamma\|U - V\|_\infty$ .

**Proof.**

Let  $b$  be an arbitrary belief and assume that  $HV(b) \leq HU(b)$  holds. Let  $\mathbf{a}^*$  be the optimal macro action for  $HU(b)$ . Then

$$\begin{aligned}
 0 &\leq HU(b) - HV(b) \\
 &\leq \mathbf{R}(b, \mathbf{a}^*) + \gamma \sum_{\mathbf{o} \in \mathcal{O}} p_\gamma(\mathbf{o}|\mathbf{a}^*, b)U(\tau(b, \mathbf{o}, \mathbf{a}^*)) - \mathbf{R}(b, \mathbf{a}^*) - \gamma \sum_{\mathbf{o} \in \mathcal{O}} p_\gamma(\mathbf{o}|\mathbf{a}^*, b)V(\tau(b, \mathbf{o}, \mathbf{a}^*)) \\
 &= \gamma \sum_{\mathbf{o} \in \mathcal{O}} p_\gamma(\mathbf{o}|\mathbf{a}^*, b)[U(\tau(b, \mathbf{o}, \mathbf{a}^*)) - V(\tau(b, \mathbf{o}, \mathbf{a}^*))] \\
 &\leq \gamma \sum_{\mathbf{o} \in \mathcal{O}} p_\gamma(\mathbf{o}|\mathbf{a}^*, b)\|U - V\|_\infty \\
 &\leq \gamma\|U - V\|_\infty.
 \end{aligned}$$

Since  $\|\cdot\|_\infty$  is symmetrical, the result is the same for the case of  $HU(b) \leq HV(b)$ . By taking  $\|\cdot\|_\infty$  over all weighted belief, we get

$$\|HU - HV\|_\infty \leq \gamma\|U - V\|_\infty.$$

Thus,  $H$  is a contractive mapping.  $\square$

**Theorem 2** The value function for an  $m$ -step policy is piecewise linear and convex and can be represented as

$$V_m(b) = \max_{\alpha \in \Gamma_m} \sum_{s \in S} \alpha(s)b(s) \quad (1)$$

where  $\Gamma_m$  is a finite collection of  $\alpha$ -vectors.

**Proof.**

We prove this property by induction. When  $m = 1$ , the initial value function  $V_1$  is the best expected reward and can be written as

$$V_1(b) = \max_{\mathbf{a}} \mathbf{R}(b, \mathbf{a}) = \max_{\mathbf{a}} \sum_{s \in S} \mathbf{R}(s, \mathbf{a})b(s).$$

This has the same form as  $V_m(b) = \max_{\alpha_m \in \Gamma_m} \sum_{s \in S} \alpha_m(s)b(s)$  where there is one linear  $\alpha$ -vector for each macro action.  $V_1(b)$  can therefore be represented as a finite collection of  $\alpha$ -vectors.

Assuming the optimal value function for any  $b_{i-1}$  is represented using a finite set of  $\alpha$ -vector  $\Gamma_{i-1} = \{\alpha_{i-1}^0, \alpha_{i-1}^1, \dots\}$  and

$$V_{i-1}(b_{i-1}) = \max_{\alpha_{i-1} \in \Gamma_{i-1}} \sum_{s \in S} b_{i-1}(s)\alpha_{i-1}(s) \quad (2)$$

Substituting

$$b_{i-1}(s) = \sum_{j=1}^{\infty} \gamma^{j-1} \sum_{s'} p(s, \mathbf{o}, j|s', \mathbf{a})b_i(s')/p_\gamma(\mathbf{o}|\mathbf{a}, b_i)$$

into (2), we get

$$V_{i-1}(b_{i-1}) = \max_{\alpha_{i-1} \in \Gamma_{i-1}} \sum_{s \in S} \frac{\sum_{j=1}^{\infty} \gamma^{j-1} \sum_{s'} p(s, \mathbf{o}, j|s', \mathbf{a})b_i(s')}{p_\gamma(\mathbf{o}|\mathbf{a}, b_i)} \alpha_{i-1}(s).$$

Substituting it into the backup equation gives

$$\begin{aligned}
 V_i(b_i) &= \max_{\mathbf{a}} (\mathbf{R}(b_i, \mathbf{a}) + \gamma \sum_{\mathbf{o} \in \mathcal{O}} p_\gamma(\mathbf{o}|\mathbf{a}, b_i) \max_{\alpha_{i-1} \in \Gamma_{i-1}} \sum_{s \in S} \frac{\sum_{j=1}^{\infty} \gamma^{j-1} \sum_{s'} p(s, \mathbf{o}, j|s', \mathbf{a})b_i(s')}{p_\gamma(\mathbf{o}|\mathbf{a}, b_i)} \alpha_{i-1}(s)) \\
 &= \max_{\mathbf{a}} (\mathbf{R}(b_i, \mathbf{a}) + \gamma \sum_{\mathbf{o} \in \mathcal{O}} \max_{\alpha_{i-1} \in \Gamma_{i-1}} \sum_{s \in S} \sum_{j=1}^{\infty} \gamma^{j-1} \sum_{s'} p(s, \mathbf{o}, j|s', \mathbf{a})b_i(s') \alpha_{i-1}(s)) \\
 &= \max_{\mathbf{a}} \max_{\alpha_{i-1}^1 \in \Gamma_{i-1}, \dots, \alpha_{i-1}^{|\mathcal{O}|} \in \Gamma_{i-1}} \sum_{s' \in S} b_i(s') \left[ \mathbf{R}(s', \mathbf{a}) + \gamma \sum_{\mathbf{o} \in \mathcal{O}} \sum_{s \in S} \sum_{j=1}^{\infty} \gamma^{j-1} p(s, \mathbf{o}, j|s', \mathbf{a}) \alpha_{i-1}^{\mathbf{o}}(s) \right]
 \end{aligned}$$

The expression in the square bracket can evaluate to  $|\mathcal{A}||\Gamma_{i-1}|^{|\mathcal{O}|}$  different vectors. We can rewrite  $V_i(b_i)$  as:

$$V_i(b_i) = \max_{\alpha_i \in \Gamma_i} \sum_{s \in \mathcal{S}} \alpha_i(s) b_i(s).$$

Hence  $V_i(b_i)$  can be represented by a finite set of  $\alpha$ -vector.  $\square$
